# Supplementary material for: Experience of Older Patients with COPD Using Disease Management Apps: A Qualitative Study
Source: MDPI journal article supplement (doi:10.3390/healthcare12070802), 2024-04-07
Supplement: s1 [file s1]

## Consolidated criteria for reporting qualitative studies (COREQ):

### 32-item checklist

Developed from:

Tong A, Sainsbury P, Craig J. Consolidated criteria for reporting qualitative research (COREQ): a 32-item checklist for interviews and focus groups. *Int J Qual Health Care*. 2007 Dec;19(6):349-57.

| No. Item                                    | Guide questions/description                                                                                                                      | Reported on Page # |
|---------------------------------------------|--------------------------------------------------------------------------------------------------------------------------------------------------|--------------------|
| Domain 1: Research team and reflexivity     |                                                                                                                                                  |                    |
| Personal Characteristics                    |                                                                                                                                                  |                    |
| 1. Interviewer/facilitator                  | Which author/s conducted the interview or focus group?                                                                                           | 4                  |
| 2. Credentials                              | What were the researcher's credentials? E.g. PhD, MD                                                                                             | 4                  |
| 3. Occupation                               | What was their occupation at the time of the study?                                                                                              | 4                  |
| 4. Gender                                   | Was the researcher male or female?                                                                                                               | 4                  |
| 5. Experience and training                  | What experience or training did the researcher have?                                                                                             | 4                  |
| Relationship with participants              |                                                                                                                                                  |                    |
| 6. Relationship established                 | Was a relationship established prior to study commencement?                                                                                      | 4                  |
| 7. Participant knowledge of the interviewer | What did the participants know about the researcher? <i>e.g. personal goals, reasons for doing the research</i>                                  | 3                  |
| 8. Interviewer characteristics              | What characteristics were reported about the interviewer/facilitator? <i>e.g. Bias, assumptions, reasons and interests in the research topic</i> | 5                  |
| Domain 2: study design                      |                                                                                                                                                  |                    |
| Theoretical framework                       |                                                                                                                                                  |                    |
| 9. Methodological orientation and Theory    | What methodological orientation was stated to underpin the study? <i>e.g.</i>                                                                    | 4                  |

|                                  |                                                                                    |   |
|----------------------------------|------------------------------------------------------------------------------------|---|
|                                  | grounded theory, discourse analysis, ethnography, phenomenology, content analysis  |   |
| Participant selection            |                                                                                    |   |
| 10. Sampling                     | How were participants selected? e.g. purposive, convenience, consecutive, snowball | 3 |
| 11. Method of approach           | How were participants approached? e.g. face-to-face, telephone, mail, email        | 4 |
| 12. Sample size                  | How many participants were in the study?                                           | 3 |
| 13. Non-participation            | How many people refused to participate or dropped out? Reasons?                    | 3 |
| Setting                          |                                                                                    |   |
| 14. Setting of data collection   | Where was the data collected? e.g. home, clinic, workplace                         | 3 |
| 15. Presence of non-participants | Was anyone else present besides the participants and researchers?                  | 3 |
| 16. Description of sample        | What are the important characteristics of the sample? e.g. demographic data, date  | 3 |
| Data collection                  |                                                                                    |   |
| 17. Interview guide              | Were questions, prompts, guides provided by the authors? Was it pilot tested?      | 4 |
| 18. Repeat interviews            | Were repeat interviews carried out? If yes, how many?                              | 4 |
| 19. Audio/visual recording       | Did the research use audio or visual recording to collect the data?                | 4 |
| 20. Field notes                  | Were field notes made during and/or after the interview or focus group?            | 4 |
| 21. Duration                     | What was the duration of the interviews or focus group?                            | 4 |
| 22. Data saturation              | Was data saturation discussed?                                                     | 4 |
| 23. Transcripts returned         | Were transcripts returned to participants for comment and/or correction?           | 4 |
| Domain 3: analysis and findings  |                                                                                    |   |
| Data analysis                    |                                                                                    |   |
| 24. Number of data coders        | How many data coders coded the data?                                               | 4 |

|                                    |                                                                                                                                   |      |
|------------------------------------|-----------------------------------------------------------------------------------------------------------------------------------|------|
| 25. Description of the coding tree | Did authors provide a description of the coding tree?                                                                             | 4    |
| 26. Derivation of themes           | Were themes identified in advance or derived from the data?                                                                       | 4    |
| 27. Software                       | What software, if applicable, was used to manage the data?                                                                        | 4    |
| 28. Participant checking           | Did participants provide feedback on the findings?                                                                                | 4    |
| Reporting                          |                                                                                                                                   |      |
| 29. Quotations presented           | Were participant quotations presented to illustrate the themes / findings? Was each quotation identified? e.g. participant number | 5-11 |
| 30. Data and findings consistent   | Was there consistency between the data presented and the findings?                                                                | 5-11 |
| 31. Clarity of major themes        | Were major themes clearly presented in the findings?                                                                              | 5-11 |
| 32. Clarity of minor themes        | Is there a description of diverse cases or discussion of minor themes?                                                            | 5-11 |
